# Supplementary material for: Evaluation of the NIOSH draft method 5525 for determination of the total reactive isocyanate group (TRIG) for aliphatic isocyanates in autobody repair shopsThis is the work of U.S. Government employees engaged in their official duties. As such it is in the public domain and exempt from copyright. ©U.S. Government.Electronic supplementary information (ESI) available: Decision tree for identifying and quantifying TRIG air samples, and three graphs showing stability data for the HDI TRIG, and FLD/UV254 and UV254/UV370 detector response ratios as a function of retention time. See http://www.rsc.org/suppdata/em/b1/b110613a/
Source: Royal Society of Chemistry journal article supplement (doi:10.1039/b110613a), 2002-04-26
Supplement: fig7.doc [file fig7.doc]

Figure 5-ESI. Stability data for the HDI TRIG up to a year from the date of original analysis. Sample age varied from one to five months in the first re-run and from five to twelve months in the second re-run. Almost identical results were found for the HDI monomer. One sample was not analyzed in re-run 2.
